# Supplementary material for: Using Bayesian methodology to explore the profile of mental health and well-being in 646 mothers of children with 13 rare genetic syndromes in relation to mothers of children with autism
Source: Springer Nature journal article supplement (doi:10.1186/s13023-018-0924-1), 2018-10-25

Depression: Group 1 – highest risk of depression

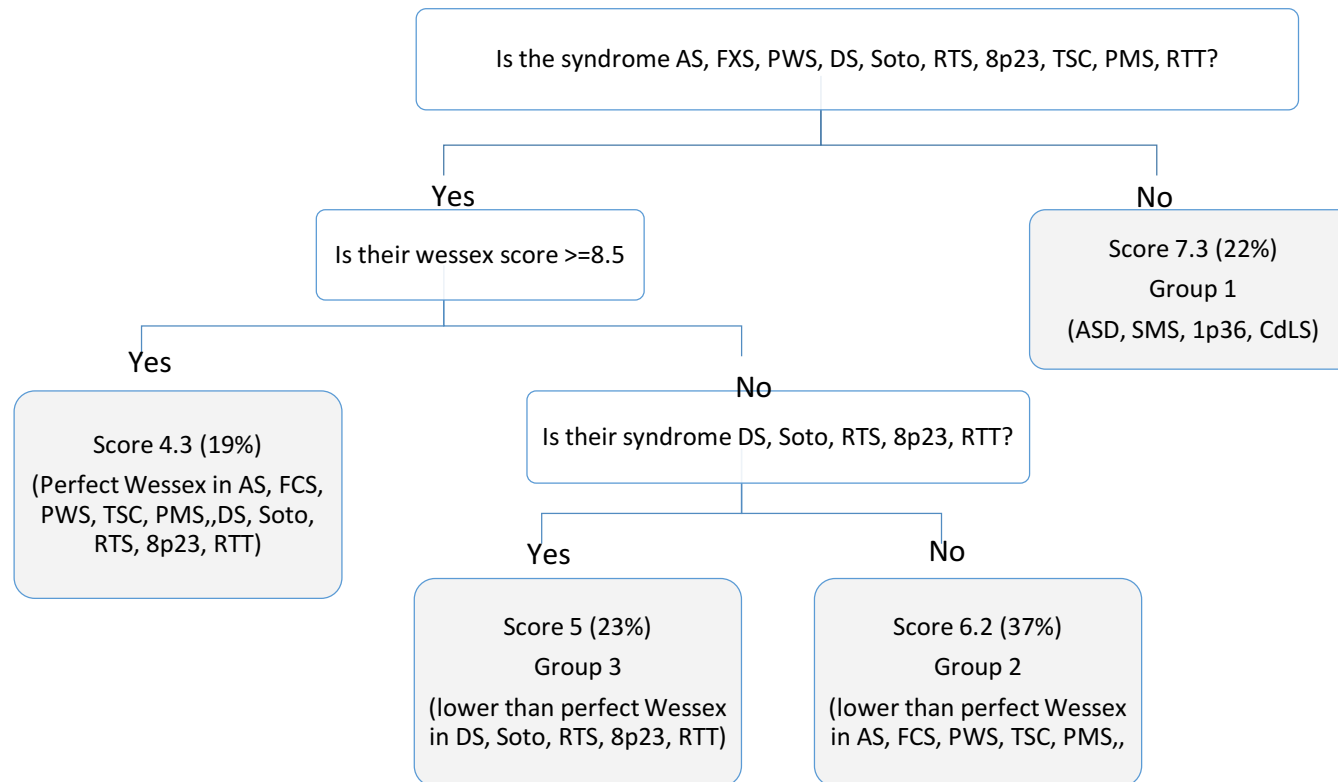

Stress (higher score, more stress)

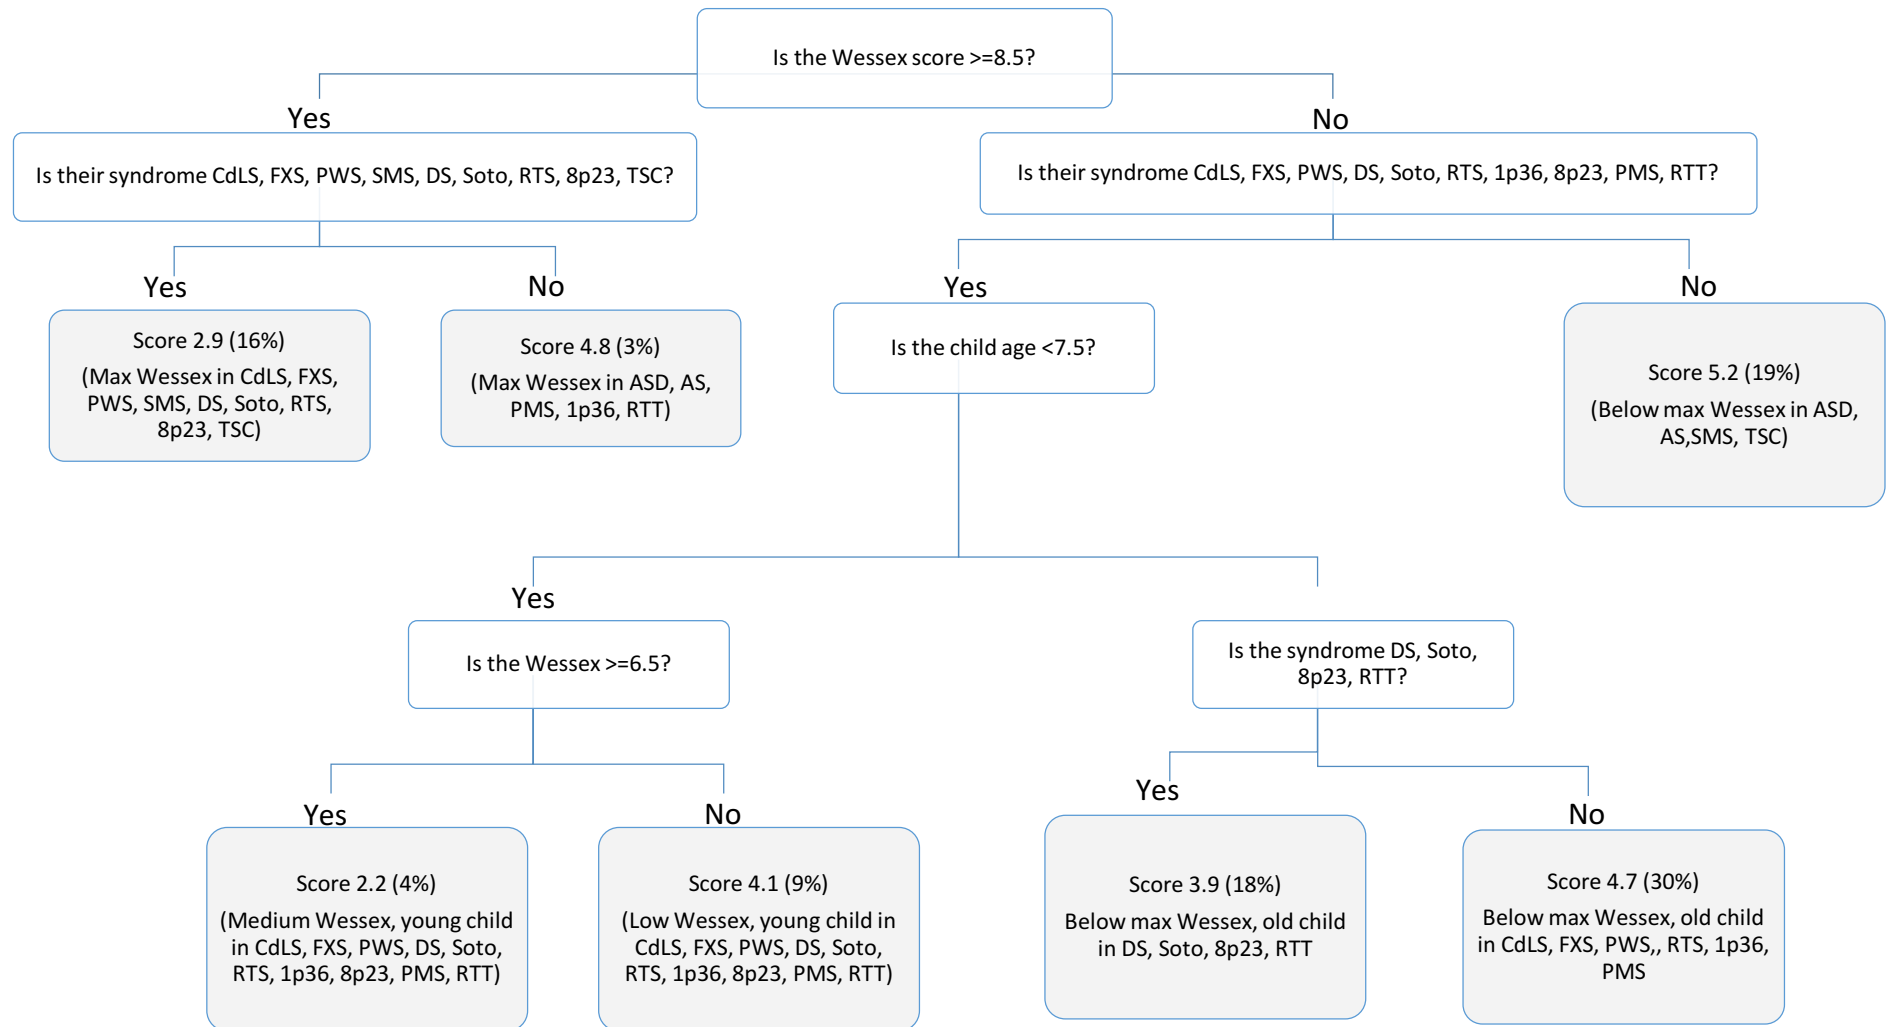

Positive Gain (higher score = more positive gain)

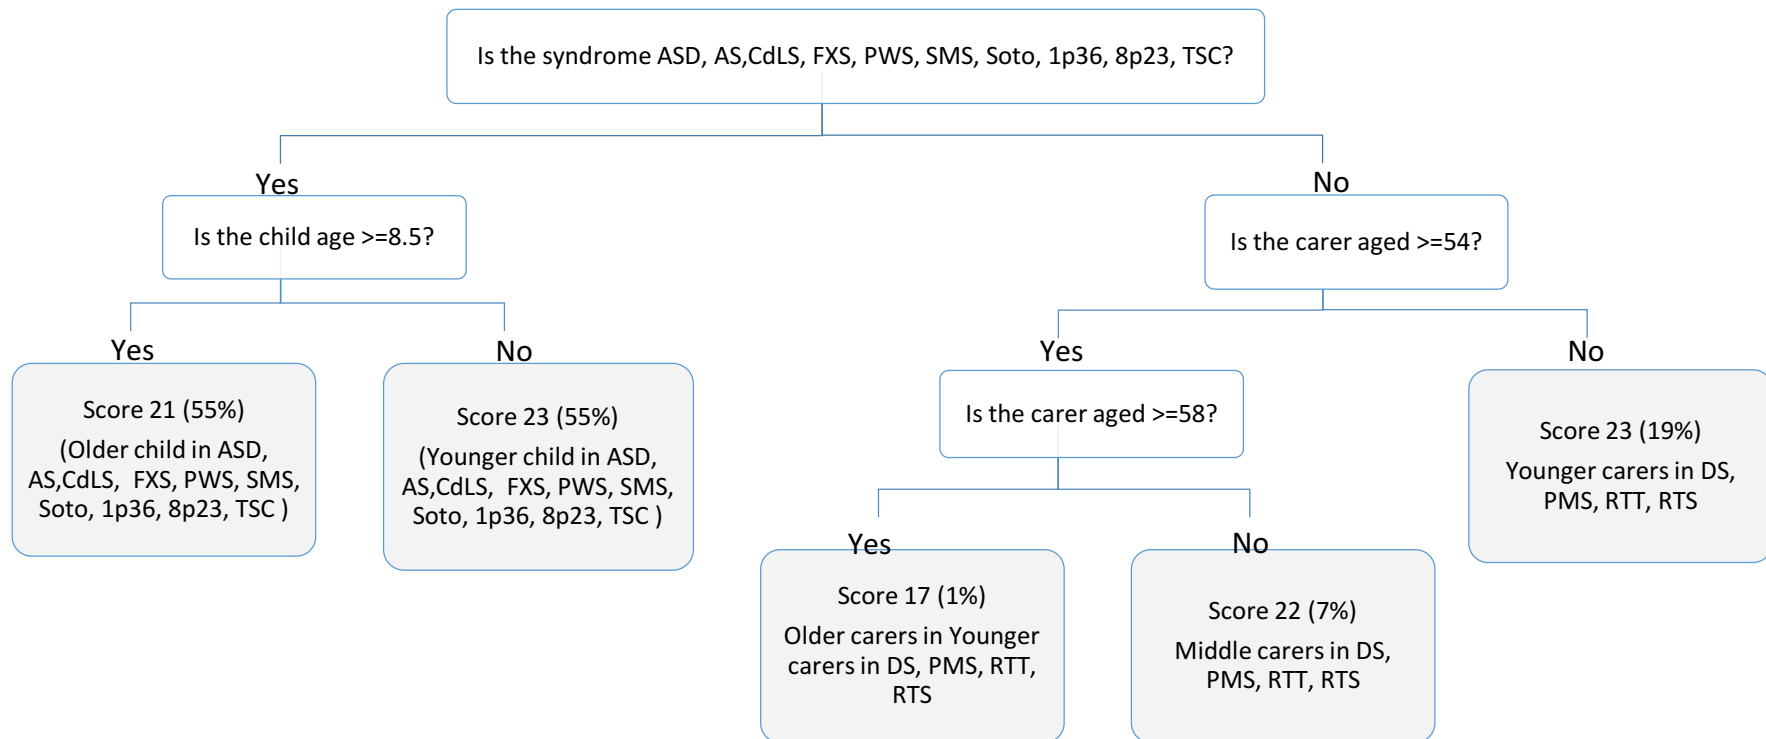

Positive affect – higher = more positive affect

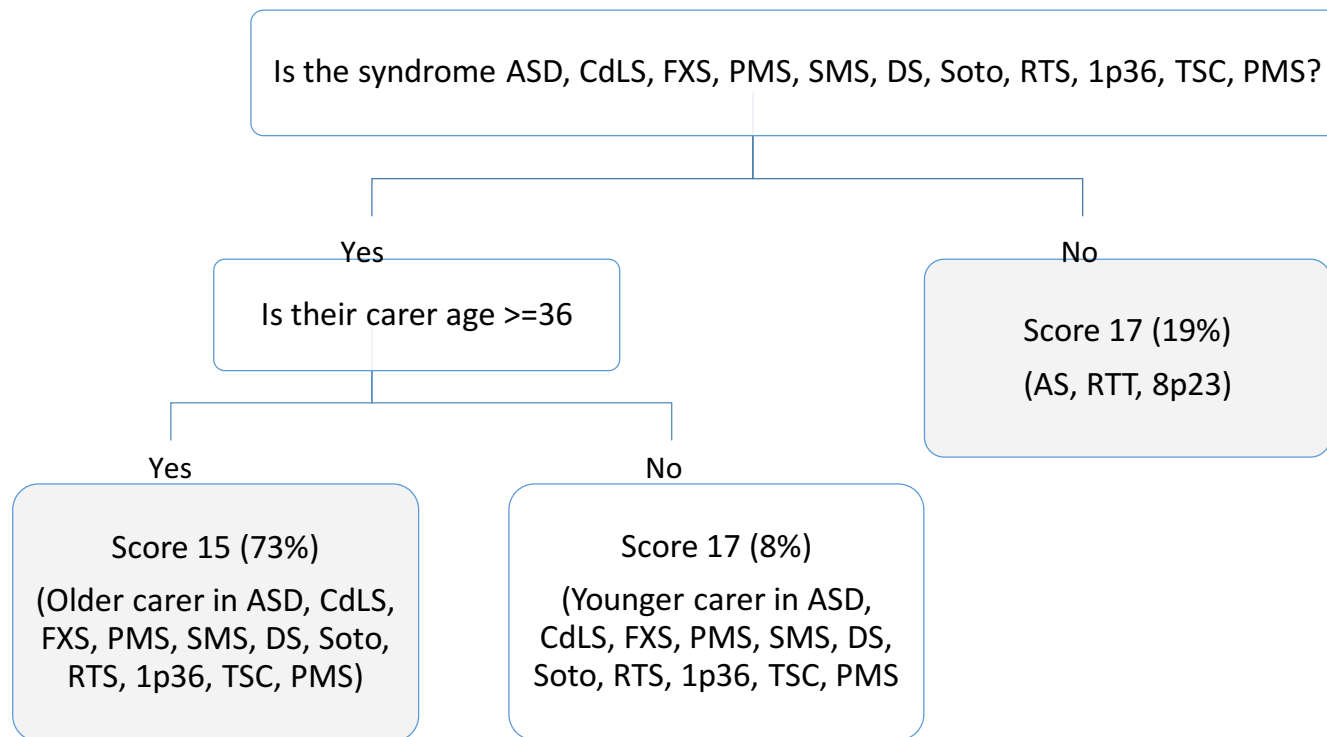

Supplement: MOESM1 [file 16226320]
